# Supplementary material
Source: PubMed Central journal article supplement (PMC6195190)
Supplement: NIHMS79213-supplement-suppl_fig_and_table_legends.pdf [file NIHMS79213-supplement-suppl_fig_and_table_legends.pdf]

**Supplementary Table 1.** Five-year age-standardised net survival (95% CI) by country<sup>a</sup>, period of diagnosis and morphological group<sup>b</sup>

Italics denote net survival estimates that are not age-standardised.

Where two or more calendar periods of diagnosis were merged, the net survival estimates are underlined.

<sup>a</sup> Countries with fewer than 10 women for any morphological group (all calendar periods combined) were not included in the analysis.

<sup>b</sup> Only microscopically verified tumours or tumours with a clinical diagnosis but specific morphology code are included.

<sup>c</sup> Endometrioid tumours are defined as type I epithelial.

<sup>d</sup> Serous tumours are defined as type II epithelial.

<sup>e</sup> Number of patients included in the analysis for a given calendar period. The number of women per registry may differ from the main CONCORD-2 analysis due to the exclusion of borderline tumours and updates from registries. The number of patients in each time period may differ from Table 4 due to merging of calendar periods.

**Supplementary Table 2.** Five-year age-standardised net survival (95% CI) by country<sup>a</sup>, period of diagnosis for all tumours, tumours of known morphology<sup>b</sup> and tumours of unknown morphology<sup>b</sup>

Italics denote net survival estimates that are not age-standardised.

Where two or more calendar periods of diagnosis were merged, the net survival estimates are underlined.

<sup>a</sup> Countries with fewer than 10 women for any morphological group (all calendar periods combined) were not included in the analysis.

<sup>b</sup> Only microscopically verified tumours or tumours with a clinical diagnosis but specific morphology code are included.

<sup>c</sup> Number of patients included in the analysis for a given calendar period. The number of women per registry may differ from the main CONCORD-2 analysis due to the exclusion of borderline tumours and updates from registries. The number of patients in each time period may differ from Table 3 due to merging of calendar periods.

**Supplementary Table 3.** Five-year age-standardised net survival (95% CI) by continent, country, registry<sup>a</sup> calendar period and stage at diagnosis

Italics denote net survival estimates that are not age-standardised.

Where two or more calendar periods of diagnosis were merged, the net survival estimates are underlined.

<sup>a</sup> Registries with fewer than 10 women for any stage (all calendar period combined) were not included in the analysis.

<sup>b</sup> Number of patients included in analysis for a given calendar period. The number of women per registry may differ from the main CONCORD-2 analysis due to the exclusion of borderline tumours and updates from registries. The total number for a country in a given calendar period may not equal the sum of the number per registry for that period due to merging of calendar periods to produce the registry level estimates.

**Supplementary Figure 1.** Flow chat of data exclusions for analysis by morphological group

**Supplementary Figure 2.** Flow chat of data exclusions for analysis by stage at diagnosis
