# Supplementary material
Source: PubMed Central journal article supplement (PMC6195190)

## SUPPLEMENTARY FIGURES

Figure 1.

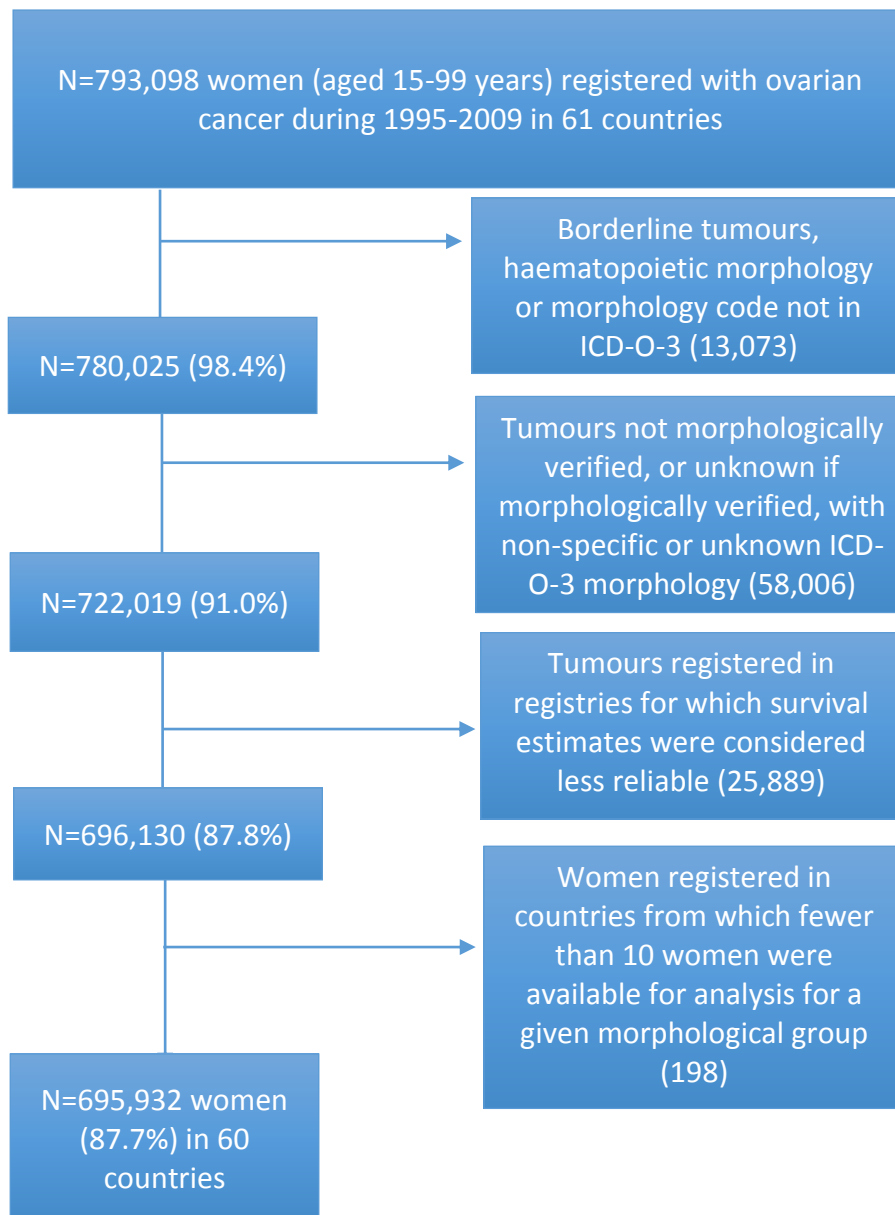

**Figure 2.**

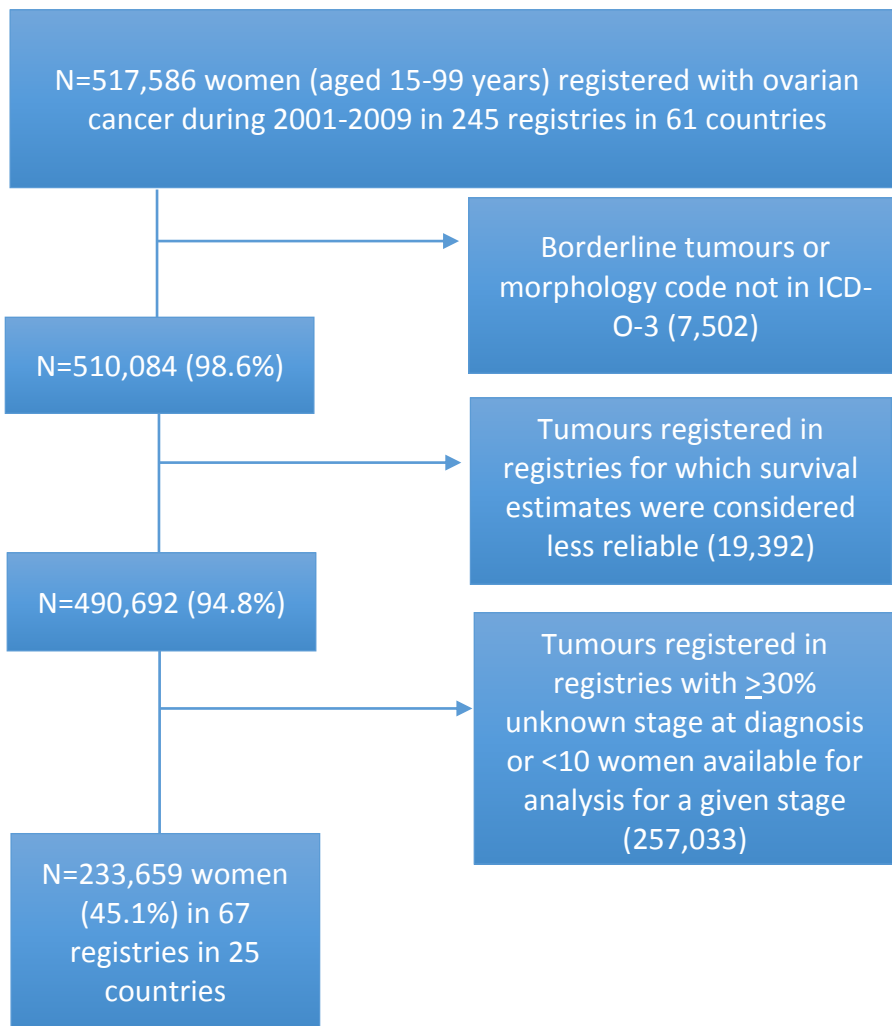

Supplement: NIHMS79213-supplement-suppl_fig_1_and_suppl_fig_2.pdf [file NIHMS79213-supplement-suppl_fig_1_and_suppl_fig_2.pdf]
